# Supplementary material
Source: ML conference proceedings conference paper supplement (https://openreview.net/forum?id=BW9KtL-bott)
Supplement: supplementary_material [file attachment]

# SPIDER: SEARCHING PERSONALIZED NEURAL ARCHITECTURE FOR FEDERATED LEARNING

Anonymous authors

Paper under double-blind review

## ABSTRACT

Federated learning (FL) is an efficient learning framework that assists distributed machine learning when data cannot be shared with a centralized server. Recent advancements in FL use predefined architecture-based learning for all clients. However, given that clients' data are invisible to the server and data distributions are non-identical across clients, a predefined architecture discovered in a centralized setting may not be an optimal solution for all the clients in FL. Motivated by this challenge, we introduce SPIDER, an algorithmic framework that aims to Search PersonalIzed neural architecture for feDERated learning. SPIDER is designed based on two unique features: (1) alternately optimizing one architecture-homogeneous global model (Supernet) in a generic FL manner and one architecture-heterogeneous local model that is connected to the global model by weight-sharing-based regularization (2) achieving architecture-heterogeneous local model by an operation-level perturbation based neural architecture search method. Experimental results demonstrate that SPIDER outperforms other state-of-the-art personalization methods with much fewer times of hyperparameter tuning.

## 1 INTRODUCTION

Federated Learning (FL) is a promising decentralized machine learning framework that facilitates data privacy and low communication costs. It has been extensively explored in various machine learning domains such as computer vision, natural language processing, and data mining. Despite many benefits of FL, one major challenge involved in FL is data heterogeneity, meaning that the data distributions across clients are not identically or independently (non-I.I.D) distributed. The non-I.I.D distributions result in the varying performance of a globally learned model across different clients. In addition to data heterogeneity, data invisibility is another challenge in FL. Since clients' private data remain invisible to the server, from the server's perspective, it is unclear how to select a pre-defined architecture from a pool of all available candidates. In practice, it may require extensive experiments and hyper-parameter tuning over different architectures, a procedure that can be prohibitively expensive.

To address the data-heterogeneity challenge, variants of the standard FedAvg have been proposed to train a global model, including the FedProx Li et al. (2018), FedOPT Reddi et al. (2020), and FedNova Wang et al. (2020). In addition to training of a global model, frameworks that focus on training personalized models have also gained a lot of popularity. The Ditto Li et al. (2021b), PerFedAvg Fallah et al. (2020a), and pFedMe Dinh et al. (2020) are some of the recent works that have shown promising results to obtain improved performance across clients. However, all these works exploit pre-defined architectures and operate at the optimization layer. Consequently, in addition to their inherent hyper-parameter tuning, these personalization frameworks often encounter the data-invisibility challenge that one has to select a suitable model architecture involving a lot of hyper-parameter tuning.

In this work, we adopt a different and complementary technique to address the data heterogeneity challenge for FL. We introduce SPIDER, an algorithmic framework that aims to Search PersonalIzed neural architecture for feDERated learning. Recall that in a centralized setting, the neural architecture search (NAS) aims to search for optimal architecture to address system design challenges such as lower latency Wu et al. (2019), lesser memory cost Li et al. (2021a), and smaller energy consump-

tion Yang et al. (2020). For architecture search, there are three [well-known](#) methods explored in literature, gradient-based Liu et al. (2018), evolutionary search Liu et al. (2021), and reinforcement learning Jaafr et al. (2019). Out of these, gradient-based methods are generally considered more efficient because of their ability to yield higher performance in comparatively lesser time Santra et al. (2021).

To achieve personalization at the architecture level in FL, we propose a unified framework, SPIDER. This framework essentially deploys two models, local and global models, on each client. Initially, both models use the DARTS search space-based Supernet Liu et al. (2018), an over-parameterized architecture. In the proposed framework, the global model is shared with the server for the FL updates and, therefore, stays the same in the architecture design. On the other hand, the local model stays completely private and performs personalized architecture search, therefore, gets updated. To search for the personalized child model, SPIDER deploys SPIDER-Searcher on each client’s local model. The SPIDER-Searcher is built upon a well-known gradient-based NAS method, named perturbation-based NAS Wang et al. (2021). The main objective of the SPIDER framework is to allow each client to search and optimize their local models while benefiting from the global model. To achieve this goal, we propose an alternating bi-level optimization-based SPIDER Trainer that trains local and global models in an alternate fashion. However, the main challenge here is the optimization of an evolving local model architecture while benefiting from a fixed global architecture. To address this challenge, SPIDER Trainer performs weight-sharing-based regularization that regularizes the common connections between the global model’s Supernet and the local model’s child model. This aids clients in searching and training heterogeneous architectures tailored for their local data distributions. In a nutshell, this approach not only yields architecture personalization in FL but also facilitates model privacy (in the sense that the derived child local model is not shared with the server at all).

To evaluate the performance of the proposed algorithm, we consider a cross-silo FL setting and use Dirichlet distribution to create non-I.I.D data distribution across clients. For evaluation, we report test accuracy at each client on the 20% of training data kept as test data for each client. We show that the architecture personalization yields better results than state-of-the-art personalization algorithms based solely on the optimization layer, such as Ditto Li et al. (2021b), perFedAvg Fallah et al. (2020a), and local adaptation Cheng et al. (2021).

To summarize, the following are the key contributions of our work.

- We propose and formulate a personalized neural architecture search framework for FL named SPIDER, from a perspective complementary to the state-of-the-art to address data heterogeneity challenges in FL.
- SPIDER is designed based on two unique features: (1) maintaining two models at each client, one to communicate with the server and the other to perform a local progressive search, and (2) operating local search and training at each client by an alternating bilevel optimization and weight sharing-based regularization along the FL updates.
- We run extensive experiments to demonstrate the benefit of SPIDER compared with state-of-the-art personalized FL approaches such as Ditto Li et al. (2021b), perFedAvg Fallah et al. (2020a) and Local Adaptation Cheng et al. (2021) on three datasets, CIFAR10, CIFAR100 and CINIC10. With the ResNet18 model, on the CIFAR10 dataset with heterogeneous distribution, we demonstrate an increase of the average local accuracy by 2.8%, 1.7%, and 5.5%, over Ditto, PerFedAvg, and Local Adaptation, respectively. Further, on CIFAR100, we demonstrate [an accuracy](#) gain of 10%, 6%, 4% over Ditto, Local Adaptation, and perFedAvg, respectively. Likewise, on CINIC-10, we demonstrate [an accuracy](#) gain of 20%, 23%, and 24% over Ditto, Local Adaptation, and perFedAvg, respectively.

## 2 RELATED WORKS

**Heterogeneous Neural Architecture for FL** Heterogeneous neural architecture is one way to personalize the model in FL. For personalization, the primal-dual framework Smith et al. (2017a), clustering Sattler et al. (2020), fine-tuning with transfer learning Yu et al. (2020b), meta-learning Fallah et al. (2020a), regularization-based method Hanzely & Richtárik (2020); Li et al. (2021b) are among the popular methods explored in the FL literature. Although these techniques achieve improved personalized performance, all of them use a pre-defined architecture for each client. Het-

eroFL Diao et al. (2020) is a recent work that accomplishes the aggregation of heterogeneous models by assigning sub-parts of the global model based on their computation budget and aggregating the parameters common between different clients. Similarly, work Luo et al. performs a limited channel-wise search to assign sub-models meeting [clients'](#) efficiency budgets and performs the partial aggregation of weights at the server. Another work Lin et al. (2020b) accomplishes this task by forming clusters of clients of the same model and allowing for heterogeneous models across clusters. Model aggregation is based on cluster-wise aggregation followed by a knowledge distillation from the aggregated models into the global model. Given data invisibility in FL, deciding which architecture would work for which client is a challenging task and requires exploration. [Another work Dudziak et al. \(2022\) personalizes architectures to compute-power-based clusters instead of individual clients.](#) As such, our proposed method aims to achieve personalized architecture automatically and focuses on the objective of tailoring architecture to individual [clients'](#) data distribution.

**Neural Architecture Search for FL** Neural Architecture Search (NAS) has gained momentum in recent literature to search for a global model in a federated setting. FedNAS He et al. (2020b) explores the compatibility of MileNAS solver with Fed averaging algorithm to search for a global model. Direct Federated NAS Hu et al. (2020) is another work in this direction that explores the compatibility of a one-shot NAS method, DSNAS Hu et al. (2020), with Fed averaging algorithm with the same application, in search of a global model. Zhu & Jin (2021) uses evolutionary NAS to design a master (global) model. Singh et al. (2020) explores the concept of differential privacy using DARTs solver Liu et al. (2018) to explore the trade-off between the accuracy and privacy of a global model. Xu et al. (2020) starts with a pre-trained handcraft model and continues pruning the model until it satisfies the efficiency budget. [Another work Hoang & Kingsford \(2021\) divides the model architecture into global and personal components, and searches the personal component for personalization on identical and independent \(IID\) vision tasks.](#) Where all these models search for a unified global model or personalized components of a shared model, a key distinction of our work with these works is that we aim to search for a complete personalized model for each client.

### 3 PRELIMINARIES, MOTIVATION, AND DESIGN GOALS

In this section, we introduce the state-of-the-art methods for personalized federated learning, discuss the motivation for personalizing model architectures, and summarize our design goals.

**Personalized Federated Learning** A natural formulation of FL is to assume that among  $c$  distinct clients, each client  $k$  has its own distribution  $P_i$ , draws data samples from  $P_i$ , and aims to solve a supervised learning task (e.g., image classification) by optimizing a global model  $\mathbf{w}$  with other clients collaboratively. At a high-level abstraction, the optimization objective is then defined as:

$$\min_{\mathbf{w}^*} G(F_1(\mathbf{w}), \dots, F_c(\mathbf{w})), \quad (1)$$

where  $F_k(\mathbf{w})$  measures the performance of the model global  $\mathbf{w}$  on the private dataset at client  $k$  (local objective), and  $G$  is the global model aggregation function that aggregates each client's local objectives. For example, for FedAvg,  $G(\cdot)$  would be weighted aggregation of the local objectives,  $\sum_{k=1}^c p_k F_k(\mathbf{w})$ , where  $\sum_{k=1}^c p_k = 1$ .

However, as distributions across individual clients are typically heterogeneous (i.e., non-I.I.D.), there is a growing line of research that advocates reformulating FL as a personalization framework, dubbed as personalized FL (PFL). In PFL, the objective is redirected to find a personalized model  $\mathbf{v}_k$  for device  $k$  that performs well on the local data distribution:

$$\min_{\mathbf{v}_1^*, \dots, \mathbf{v}_c^*} (F_1(\mathbf{v}_1), \dots, F_c(\mathbf{v}_c)), \quad (2)$$

To solve this challenging problem, various PFL methods are proposed, including FedAvg with local adaptation (Local-FL) Cheng et al. (2021); Yu et al. (2020a); Wang et al. (2019), MAML-based PFL (MAML-FL) Fallah et al. (2020b); Jiang et al. (2019), clustered FL (CFL) Ghosh et al. (2020); Sattler et al. (2021), [personalized layer-based FL \(PL-FL\) Liang et al. \(2020\); Hoang & Kingsford \(2021\); Pillutla et al. \(2022\); Hoang & Kingsford \(2021\)](#), federated multitask learning (FMTL) Smith et al. (2017b) and knowledge distillation (KD) Lin et al. (2020a); He et al. (2020a).

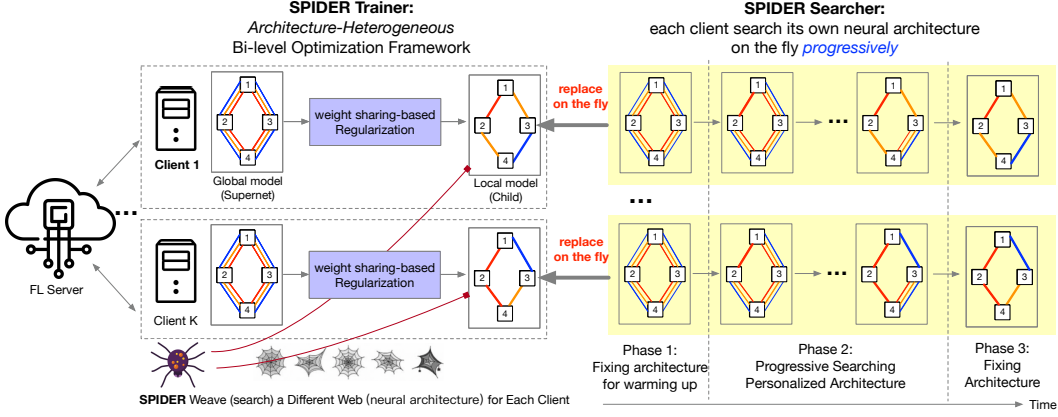

Figure 1: Illustration of SPIDER framework. SPIDER is weaving (searching) a different web (neural architecture) for each client.

**Motivation for Neural Architecture Personalization** Distinct from these existing works on PFL, we propose a new approach to instead personalize model architecture for each client. We are motivated by one critical potential benefit, that is, the searched architecture for each client is expected to fit its own distinct distribution, which has the potential to provide a substantial improvement over the existing PFL baselines that only personalize model weights. In addition, a personalized architecture search allows the clients to even keep their local model architectures private in a sense the server and other clients neither know the architecture nor the weights of that architecture. This further enhances the privacy guarantees of FL and is helpful in business cases that each client hopes to also protect its model architecture.

**Design Goals** Our goal is to enable personalized neural architecture search for all clients in FL. In this context, the limitation of existing personalized FL methods is obvious: Local-FL and MAML-FL need every client to have the same architecture to perform local adaptations; In CFL, the clustering step requires all clients to share a homogeneous model architecture; PL-FL can only obtain heterogeneous architectures for a small portion of personalized layers, but it does not provide an architecture-agnostic method to determine the boundary of personalized layers in an automated mechanism; FMTL is a regularization-based method which cannot perform regularization when architectures are heterogeneous across clients; KD has an unrealistic assumption that the server has enough public dataset as the auxiliary data for knowledge distillation.

To circumvent these limitations, our goal is to design an architecture-personalized FL framework with the following requirements:

- **R1:** allowing heterogeneous architectures for all clients, which can capture fine-grained data heterogeneity;
- **R2:** searching and personalizing the entire architecture space, to avoid the heuristic search for the boundary of personalized layers;
- **R3:** requiring no auxiliary data at the client- or server-side (unlike knowledge distillation-based PFL);

We now introduce SPIDER which meets the above requirements in a unified framework.

## 4 METHODOLOGY: SPIDER

### 4.1 OVERVIEW

The overall framework of SPIDER is illustrated in Figure 1. Essentially, each client maintains two models in this framework: one architecture-homogeneous global model for collaborative training with other clients, and one architecture-heterogeneous local model that initially shares the same super architecture space as the global model. At a high-level, SPIDER is formulated as an **architecture-personalized bi-level optimization** problem (Section 4.2) and proposes the solver as

the orchestration of **SPIDER Trainer** (Section 4.3) and **SPIDER-Searcher** (Section 4.4). **SPIDER Trainer** is an architecture-personalized training framework that can collaboratively train heterogeneous neural architectures across clients. To allow federated training on the expected heterogeneous local architectures, it enables regularization between an arbitrary personalized architecture and the global model via weight sharing. With this support, **SPIDER-Searcher** is designed to *dynamically adjust the architecture of each client’s local model on the way*. To search a personalized architecture for the local data distribution of each client, SPIDER-Searcher is built on a novel neural architecture search (NAS) method that searches optimal local Subnet progressively using operation-level perturbation on the accuracy value as the criterion. Overall, each client’s local model goes through three phases (also shown in Figure 1): pre-training to warm up the initial local model, progressive neural architecture search, and final training of the searched architecture-personalized model.

SPIDER can meet the design goals **R1-R3** introduced in Section 3 because 1) each client performs independent architecture personalization with its own private data (**R1**), 2) the search space is not restricted to a portion of the model (**R2**), and 3) no auxiliary data is used to assist the search and train process (**R3**).

#### 4.2 SPIDER FORMULATION: ARCHITECTURE-PERSONALIZED BI-LEVEL OPTIMIZATION

SPIDER aims to personalize (weave) a different neural architecture (web) for each client. To generate heterogeneous architectures across clients, we use two models, a local model ( $\mathcal{A}_k$ ) and a global model (Supernet  $\mathcal{A}$ ) at each client, and formulate SPIDER as an architecture-personalized bi-level optimization problem for each client  $k \in \{1, 2, \dots, c\}$ :

$$\min_{\mathbf{v}_k, \mathcal{A}_k \subseteq \mathcal{A}} F_k(\mathbf{v}_k, \mathcal{A}_k; \mathbf{w}^*, \mathcal{A}) \quad (3)$$

$$\text{s.t. } \mathbf{w}^* \in \arg \min_{\mathbf{w}} G(F_1(\mathbf{w}, \mathcal{A}), \dots, F_K(\mathbf{w}, \mathcal{A})), \quad (4)$$

where  $F_k$  is the local objective of the client  $k$ ;  $\mathbf{w}$ , and  $\mathbf{v}_k$  are all learnable parameters;  $\mathbf{w}$  denotes the parameter of the global model architecture  $\mathcal{A}$ ,  $\mathbf{v}_k$  is the weight parameter of the local personalized architecture  $\mathcal{A}_k$  of the client  $k$ . Here,  $\mathcal{A}_k$  is a child neural architecture of a Supernet  $\mathcal{A}$  such that  $\mathcal{A}_k \subseteq \mathcal{A}$ . The Supernet  $\mathcal{A}$  can be considered having a mask  $M$ , each entry representing a learnable parameter  $\alpha_{ij}$ ,  $i \in \{1, 2, \dots, e\}$  and  $j \in \{1, 2, \dots, o\}$  where  $e$  is the total number of edges and  $o$  is the total number of operations at each edge. Hence, the size of mask  $M$  is equal to  $e \times o$ . For the Supernet mask  $M$ , all  $\alpha_{ij}$  entries are 1. Likewise, we maintain a mask  $M_k$  for local models  $\mathcal{A}_k$ . Our goal is to optimize  $\alpha_{ij}$  parameters of the mask  $M_k$  such that we learn child architecture  $\mathcal{A}_k = M_k \odot \mathcal{A}$ . Note that in Eq.(4), we aim to learn a global model  $\mathcal{A}$  in a federated learning setting, which formulates our *outer optimization*. However, in the inner optimization given in Eq.(3), the objective of each client is to optimize its local model’s architecture  $\mathcal{A}_k$  and its associated parameters  $\mathbf{v}_k$  while benefiting from the global model  $\mathbf{w}^*$ . As a tractable, yet general case study, SPIDER reuses the DARTS architecture space as Supernet  $\mathcal{A}$  that contains a set of edges  $\{1, \dots, e\}$ , and each edge has multiple operations  $\{1, \dots, o\}$ . Based on this definition,  $\mathcal{A}_k$  maintains the operation-level granularity:  $\mathcal{A}_k$ ’s edge set space is a subset of  $\mathcal{A}$ ’s edge set space, and the operation set in  $\mathcal{A}_k$ ’s each edge may also be a subset space. We provide further details of the search space in Appendix A.3.

**The difficulty of jointly optimizing the architecture  $\mathcal{A}_k$  and related weight parameters  $\mathbf{v}_k$**  The key difference of our formulation from existing bi-level optimization for FL (e.g., Li et al. (2021b)) is that in our case,  $\mathcal{A}_k$  is also learnable (Eq.(3)). We assume each client can have an evolving architecture  $\mathcal{A}_k$ , i.e., Eq.(3) has to optimize the architecture  $\mathcal{A}_k$  and its related weight parameters  $\mathbf{v}_k$  jointly, while using complete Supernet-based global model weights,  $\mathbf{w}$ . SPIDER addresses this challenge by the orchestration of SPIDER-Trainer and SPIDER-Searcher.

#### 4.3 SPIDER TRAINER: FEDERATED TRAINING ON HETEROGENEOUS ARCHITECTURES

In this section, we describe SPIDER trainer, an architecture-personalized training framework that can collaboratively train heterogeneous neural architectures across clients.

To clearly show how SPIDER handles the optimization difficulty of Eq.(3), we first downgrade the objective to the case that all clients use *predefined* (fixed) heterogeneous architectures (derived from



the Supernet  $\mathcal{A}$ ). More specially, we reduce the aforementioned optimization framework in Eq.(3) and Eq.(4) to the following:

$$\min_{\mathbf{v}_k} h_k(\mathbf{v}_k, \mathcal{A}_k; \mathbf{w}^*, \mathcal{A}) = F_k(\mathbf{v}_k) + \frac{\lambda}{2} \|\mathbf{v}_k - \mathbf{w}_{share}^*\|^2 \quad (5)$$

$$\text{s.t. } \mathbf{w}^* \in \arg \min_{\mathbf{w}} G(F_1(\mathbf{w}, \mathcal{A}), \dots, F_K(\mathbf{w}, \mathcal{A})), \quad (6)$$

where local model's weights  $\mathbf{v}_k$  are regularized towards the global model  $\mathbf{w}_{share}^*$ , where  $\mathbf{w}_{share}^*$  are the weight parameters of the operation set space of  $\mathcal{A}$  overlapping (sharing) with  $\mathcal{A}_k$ . Also,  $\lambda$  is the regularization hyper-parameter. Note that, now, only  $\mathbf{v}_k$  needs to be optimized in Eq.5, while  $\mathcal{A}_k$  is fixed during the optimization.

We then solve Eq.5 and Eq.6 alternately. We summarize this optimization procedure as SPIDER-Trainer with a detailed pseudo code illustrated in [Algorithm 1](#). In this algorithm, we can note that the global model (line #12) and the local model (line #15) are updated alternately. The strength of this algorithm lies in its elaborate design, which provides the following key benefits:

---

#### Algorithm 1 SPIDER Trainer

---

```

1: Initialization: initialize  $c$  clients with the  $k$ -th client has a global model  $\mathbf{w}_k$  using Supernet  $\mathcal{A}$ , and a local
   model  $\mathbf{v}_k$  using subnet  $\mathcal{A}_k$  with mask  $M_k$  (set  $\mathcal{A}_k = \mathcal{A}$  at the beginning);  $p$  is the number of local epochs;
    $r$  is the number of rounds;  $t_s$  number of rounds to start search;  $\tau$  is the recovery periods in the units of
   rounds.
2: Server executes:
3:   for each round  $t = 0, 1, 2, \dots, r - 1$  do
4:     for each client  $k$  in parallel do
5:        $\mathbf{w}_k^{t+1} \leftarrow \text{ClientLocalSearch}(k, \mathbf{w}^t, t)$ 
6:        $\mathbf{w}^{t+1} \leftarrow \sum_{k=1}^K \frac{N_k}{N} \mathbf{w}_k^{t+1}$ 
7:
8:   function  $\text{ClientLocalSearch}(k, \mathbf{w}^t, t)$ : // Run on client  $k$ 
9:     for each epoch in  $p$  do
10:      for minibatch in training and validation data do
11:         $\mathcal{A}_k^{t+1}, M_k^{t+1} = \text{ProgressiveNAS}(\mathcal{A}_k^t, M_k^t, t_s, \tau, t)$ 
12:        Update Global model:  $\mathbf{w}^{t+1} = \mathbf{w}^t - \eta_w \nabla_{\mathbf{w}} \mathcal{L}_k^{\text{tr}}(\mathbf{w}^t)$ 
13:        for each  $\alpha_{ij}$  in  $M_k^{t+1}$  do
14:           $w_{shareij}^{t+1} = w_{ij}^{t+1} \odot \alpha_{ij}$  // overlapping operation set space between  $\mathcal{A}$  and  $\mathcal{A}_k$ 
15:        Update Local Model:  $\mathbf{v}_k^{t+1} = \mathbf{v}_k^t - \eta_v (\nabla_{\mathbf{v}} \mathcal{L}_k^{\text{tr}}(\mathbf{v}_k^t) + \lambda(\mathbf{v}_k^t - \mathbf{w}_{share}^{t+1}))$ 
16:      return  $\mathbf{w}$  to server

```

---

**(1) Enabling regularization between an arbitrary personalized architecture and the global model** Most importantly, SPIDER-Trainer connects each personalized model with the global model by enabling the regularization between two different architectures: an arbitrary personalized architecture for the local model  $\mathcal{A}_k$  of client  $k$  and the global model with Supernet  $\mathcal{A}$ . This is done by weight sharing.  $\mathbf{w}_{share}^*$  is essentially used to regularize a subnet ( $\mathcal{A}_k$ ) model parameters  $\mathbf{v}_k$  towards the global model shared/common parameters  $\mathbf{w}_{share}^*$ , as shown in Eq. 6.

**(2) Avoiding heterogeneous aggregation** SPIDER-Trainer avoids the aggregation of heterogeneous model architectures at the server side. As such, no sophisticated and unstable aggregation methods are required (e.g. knowledge distillation Lin et al. (2020a), etc.), and it is flexible to use other aggregation methods beyond FedAvg (e.g., Karimireddy et al. (2020); Reddi et al. (2021)) to update the global model.

**(3) Enabling architecture privacy** In this algorithm, only the global model is transmitted between the client and the server. This enables architecture privacy because each client's architecture is hidden from the server and other clients.

**(4) Potential robustness to adversarial attacks** The weight sharing-based regularization not only yields the benefit of personalization in FL but also makes the FL framework more robust to adversarial attacks. Its robustness advantage comes from its ability to keep the local model private and regularize towards the global model based on its regularization parameter, as shown before by architecture-homogeneous bi-level optimization Li et al. (2021b).

#### 4.4 SPIDER-SEARCHER: PERSONALIZING ARCHITECTURE

Although SPIDER trainer is able to collaboratively train heterogeneous architectures, manual design of the architecture for each client is impractical or suboptimal. As such, we further add a neural architecture search (NAS) component, SPIDER-Searcher, in Algorithm 1 (line #11) to adapt  $\mathcal{A}_k$  to its local data distribution in a progressive manner. We now present the details of the SPIDER-Searcher.

**Progressive Neural Architecture Search** Essentially, SPIDER-Searcher dynamically changes the architecture of  $\mathcal{A}_k$  during the entire federated training process. This is feasible because the weight sharing-based regularization can handle an arbitrary personalized architecture (introduced in Section 4.3). Due to this characteristic, SPIDER-Searcher can search  $\mathcal{A}_k$  in a progressive manner (shown in Figure 1): **Phase 1:** At the beginning,  $\mathcal{A}_k$  is set equal to Supernet  $\mathcal{A}$ . The intention of SPIDER-Searcher in this phase is to warm up the training of the initial  $\mathcal{A}_k$  so it does not change  $\mathcal{A}_k$  for a few rounds; **Phase 2:** After warming up, SPIDER-Searcher performs edge-by-edge search gradually. In each edge search, only the operation with the highest impact on the accuracy is kept. It also uses a few rounds of training as a recovery time before proceeding to the next round of search. This process continues until all edges finish searching; **Phase 3:** After all edges finish searching, SPIDER-Searcher does not change  $\mathcal{A}_k$ . This serves as a final training of the searched architecture-personalized model. This three-phase procedure is summarized as Algorithm 2. Now, we proceed to elaborate on how we calculate the impact of an operation on the Supernet.

---

##### Algorithm 2 SPIDER-Searcher

---

```

1: Search Space: in the architecture  $\mathcal{A}_k^t \subseteq \mathcal{A}$ ,  $\mathcal{E}$  is the super set of all edges  $\{1, \dots, e\}$ ,  $\mathcal{E}_s$  is the remaining
   subset of edges that have not been searched, and each edge  $e$  has multiple operations  $\{1, \dots, o\}$ .
2: function ProgressiveNAS( $\mathcal{A}_k^t$ ,  $M_k^{t,t_s}$ ,  $\tau$ ,  $t$ )
3:   if  $t \geq t_s$  and  $t \% \tau == 0$  and  $\text{LEN}(\mathcal{E}_s) > 0$  then
4:      $i = \text{RANDOM}(\mathcal{E}_s)$  // random selection
5:     // searching without training
6:     for all operation  $j$  on edge  $i$  do
7:       evaluate validation accuracy of  $\mathcal{A}_k$  when operation  $\alpha_{ij}$  is set to zero (removed) ( $\text{ACC}_{\setminus \alpha_{ij}}$ )
8:       in the  $i$ th row of  $M_k^t$ , keep only one operation  $\alpha_{ij} = 1$  corresponding to the lowest value of
       ( $\text{ACC}_{\setminus \alpha_{ij}}$ ).
9:       remove  $i$  from  $\mathcal{E}_s$ , update  $\mathcal{A}_k^{t+1} = \mathcal{A}_k^t \odot M_k^t$ .
10:    else
11:      return  $\mathcal{A}_k^t$  and  $M_k^t$  directly
12:    return updated  $\mathcal{A}_k^{t+1}$  and  $M_k$  after selection

```

---

**Operation-level perturbation-based selection** In phase 2, we specify selecting the operation with the highest impact using operation-level perturbation. More specially, instead of optimizing the mixed operation architecture parameters  $\alpha$  using another bi-level optimization as DARTS (a.k.a. gradient-based search) to pick optimal operation according to magnitude of  $\alpha$  parameters (*magnitude-based selection*), we assign a constant value to  $\alpha$  and use *the impact of an operation on the local validation accuracy* (perturbation) as a criterion to search on the edge. This simplified method is much more efficient given that it only requires evaluation-based search rather than training-based search (optimizing  $\alpha_{ij}$ ). In addition, it avoids inserting another bi-level optimization for NAS inside a bi-level optimization for FL, making the framework stable and easy to tune. Finally, this method avoids suboptimal architecture Wang et al. (2021) lead by magnitude-based selection in differentiable NAS.

## 5 EXPERIMENTS

This section presents the experimental results of the proposed method, SPIDER. All our experiments are based on non-IID data distribution among FL clients. We have used latent Dirichlet Distribution (LDA), which is a common data distribution in FL to generate non-IID data across clients He et al. (2020c), Yurochkin et al. (2019).

## 5.1 EXPERIMENTAL SETUP

**Task and Dataset** We perform an image classification task on three well-known datasets, **CIFAR10**, **CIFAR100** and **CINIC10**. CIFAR10 dataset consists of 60000 32x32 color images in 10 classes, with 6000 images per class, and CIFAR100 dataset consists of 60,000 images in 100 classes, with 600 images per class. CIFAR100 has more classes and comparatively fewer data per class, therefore, it is considered more challenging than CIFAR10. In addition, CINIC10 consists of 270,000 32x32 color images in 10 classes, with 90,000 images per train, test, and validation subset. CINIC10 dataset is a larger dataset and includes images from ImageNet as well. We generate non-IID data across 8 clients by exploiting LDA distribution with parameter ( $\alpha = 0.2$ ) for the training data of CIFAR10, CIFAR100, and CINIC10 datasets. The LDA distribution of CIFAR10 and CIFAR100 has been shown in Appendix A.1.

For personalized architecture experiments with SPIDER, we split the total training data samples present at each client into training (50%), validation (30%), and testing sets (20%). For other personalization schemes used for comparison, we do not need validation data. Therefore, we split the data samples of each client with training (80%) and test (20%) for a fair comparison. In addition, we fix the non-IID data distribution in all experiments. We provide Hyperparameter search details in Appendix A.2.

Table 1: Average local validation Accuracy Comparison of SPIDER with other personalization techniques on CIFAR10, CIFAR100 and CINIC10 Datasets

| Method                      | CIFAR10          |                | CIFAR100         |                | CINIC10          |                |
|-----------------------------|------------------|----------------|------------------|----------------|------------------|----------------|
|                             | Average Accuracy | Parameter Size | Average Accuracy | Parameter Size | Average Accuracy | Parameter Size |
| Local Adaptation - ResNet18 | 0.87±0.02        | 11M            | 0.61±0.03        | 11M            | 0.61±0.05        | 11M            |
| Ditto - ResNet18            | 0.90±0.03        | 11M            | 0.57±0.03        | 11M            | 0.64±0.05        | 11M            |
| perFedAvg - ResNet18        | 0.91±0.02        | 11M            | 0.64±0.03        | 11M            | 0.59±0.03        | 11M            |
| Local Adaptation - DARTS    | 0.85±0.03        | 4.7M           | 0.63±0.04        | 4.7M           | 0.73±0.04        | 4.7M           |
| Ditto - DARTS               | 0.77±0.05        | 4.7M           | 0.45±0.04        | 4.7M           | 0.60±0.03        | 4.7M           |
| SPIDER                      | <b>0.93±0.02</b> | <b>2.8M</b>    | <b>0.68±0.03</b> | <b>3.1M</b>    | <b>0.84±0.07</b> | <b>3.3M</b>    |

**Implementation and Deployment** We implement the proposed method for distributed computing with nine nodes, each equipped with GPUs. We set this as a cross-silo FL setting with one node representing the server and eight nodes representing the clients. These client nodes can represent real-world organizations such as hospitals and clinics that aim to collaboratively search for personalized architectures for local benefits such as higher accuracy in a privacy-preserving FL manner. Since we are working on a cross-silo setting, neural architecture search cost may not be a concern since devices in cross-silo are rich in resources.

## 5.2 RESULTS

Here, we report the comparison of our proposed method SPIDER with the other state-of-the-art personalized methods; Ditto, perFedAvg, and local adaptation. Since these schemes use a pre-defined architecture, we use the ResNet18 model because of its comparable model size. Since we are exploiting DARTS based search space in this work, we also use a DARTS model Liu et al. (2018) searched in a centralized setting on CIFAR10 dataset as our base model for local adaptation and Ditto personalization schemes.

### 5.2.1 AVERAGE TEST ACCURACY

As illustrated in Table 1, our method, SPIDER, achieves the objective **R1** by outperforming the state-of-the-art personalization methods; Ditto, local adaptation and perFedAvg on three image classification datasets CIFAR10, CIFAR100 and CINIC10. For CIFAR100 and CINIC10 dataset, Local adaptation with the DARTS based model performed the second best and outperformed Ditto, perFedAvg and Local adaption on ResNet18. For CIFAR10, perFedAvg with Resnet18 performed the second best. Overall, we obtain 2%, 4% and 11% higher accuracy as compared to the best performing scheme from the representative state-of-the-art personalization algorithms; Ditto, local adaptation, and perFedAvg, on the CIFAR10, CIFAR100 and CINIC-10 datasets, respectively. For CINIC10 dataset, we observe substantial performance gain (11%) with respect to the sota personalization techniques. We attribute this gain to the potential of SPIDER to adapt to invisible data better



by tailoring architectures for each client according to their data distribution. In addition, Ditto with DARTS model did not perform well for all three datasets and may need a bigger hyper-parameter search set than the one we considered (given in Appendix A.2) to converge better.

For personalization, in addition to average accuracy, the standard deviation (std) is also considered an important metric. Therefore, we also report the standard deviation for each method in Table 1. We note that the standard deviation across clients is almost similar for CIFAR10 and CIFAR100 datasets. For CINIC10, the standard deviation of SPIDER is slightly higher but this is achieved at 11% higher accuracy. Overall, we achieve almost the same standard deviation as other baselines but with the benefit of providing higher average test accuracy.

### 5.2.2 ARCHITECTURE HETEROGENEITY AND PERSONALIZATION GAIN

An important feature of SPIDER is that it helps each client search for its own architecture tailored for its own specific data distribution. Due to data heterogeneity across clients, we observe architectures to be heterogeneous across clients as shown in Appendix B.4, hence we achieve the objective **R2**, the search and training of heterogeneous architectures across clients. The objective **R3**, no dependence on auxiliary data, is obtained by the algorithmic framework of SPIDER as it does not rely on any auxiliary data and exploits only the client’s dataset for searching and training. A byproduct of using DARTS search space is that the average parameter size of the models obtained with SPIDER is quite smaller. In order to further investigate whether the architecture searched by one client is best suited for its own data distribution, we perform the following experiment.

For any given client  $i$ , we apply its final architecture with its learned weights to another client  $j$ ’s data and finetune  $i$ ’s architecture on  $j$ ’s data. We denote the accuracy we obtain on data  $j$  via architecture  $i$  as  $AP_{ij}$ . We calculate the architecture  $i$  personalization gain or drop (if negative) as follows,

$$g_i = \frac{\sum_{j=0, j \neq i}^{c-1} (AP_{ii} - AP_{ji})}{c - 1} \quad (7)$$

We calculate it across all silos. The quantity  $g_i$  signifies the personalization gain of architecture  $i$  across other silos architectures on its own dataset. Next, we calculate the personalization gain of SPIDER scheme as the mean of all  $g_i$ , i.e.,  $\frac{\sum_{i=0}^{c-1} g_i}{c}$ , where  $c$  is the total number of clients in the network. We conduct this experiment on CIFAR10, CIFAR100, CINIC10 datasets, where we finetune the architecture learned via SPIDER on other clients’ data for 20 epochs and report the best accuracy. We obtain 1.96%, 3.11%, 3.71% personalization gain on CIFAR10, CIFAR100 and CINIC10 datasets, respectively. We observe that for the majority of the clients, its searched architecture outperforms the other architectures. This highlights the importance of architecture personalization which can be more powerful than just weight personalization (as shown by our empirical results). We report the  $AP_{ij}$  and  $AP_i$  values for all  $i$  and  $j$  in Table 2 and Appendix section B.4.

Table 2: CINIC10: Personalization Gain Analysis

(a) Accuracy values of Architecture  $i$  on  $j$ 's data (where  $i$  and  $j$  represent client IDs.

| (j, i) | i = 0 | i = 1 | i = 2 | i = 3 | i = 4 | i = 5 | i = 6 | i = 7 |
|--------|-------|-------|-------|-------|-------|-------|-------|-------|
| j = 0  | 90.59 | 88.98 | 88.65 | 88.75 | 89.56 | 89.17 | 89.17 | 88.27 |
| j = 1  | 86.54 | 90.55 | 87.42 | 87.79 | 87.59 | 87.94 | 87.21 | 86.25 |
| j = 2  | 72.79 | 73.27 | 78.23 | 73.49 | 75.21 | 74.62 | 74.73 | 73.81 |
| j = 3  | 83.71 | 84.27 | 84.22 | 88.35 | 84.68 | 84.82 | 84.63 | 84.43 |
| j = 4  | 69.46 | 71.40 | 70.34 | 71.69 | 75.29 | 70.58 | 71.52 | 67.92 |
| j = 5  | 73.90 | 71.95 | 74.45 | 73.16 | 74.02 | 77.53 | 74.18 | 72.03 |
| j = 6  | 83.21 | 83.69 | 84.29 | 82.40 | 83.78 | 82.92 | 88.48 | 81.76 |
| j = 7  | 89.5  | 88.68 | 89.81 | 88.37 | 89.5  | 89.19 | 88.44 | 91.25 |

(b) Accuracy Gain/Drop Matrix ( $AP_{jj} - AP_{ij}$ ) and the resultant  $g_j$  vector

| (j, i) | i = 0 | i = 1 | i = 2 | i = 3 | i = 4 | i = 5 | i = 6 | i = 7 | $g_j$ |
|--------|-------|-------|-------|-------|-------|-------|-------|-------|-------|
| j = 0  | 0     | 1.61  | 1.94  | 1.84  | 1.03  | 1.42  | 1.42  | 2.32  | 1.65  |
| j = 1  | 4.01  | 0     | 3.13  | 2.76  | 2.96  | 2.61  | 3.34  | 4.3   | 3.30  |
| j = 2  | 5.44  | 4.96  | 0     | 4.74  | 3.02  | 3.61  | 3.5   | 4.42  | 4.24  |
| j = 3  | 4.64  | 4.08  | 4.13  | 0     | 3.67  | 3.53  | 3.72  | 3.92  | 3.96  |
| j = 4  | 5.83  | 3.89  | 4.95  | 3.6   | 0     | 4.71  | 3.77  | 7.37  | 4.87  |
| j = 5  | 3.63  | 5.58  | 3.08  | 4.37  | 3.51  | 0     | 3.35  | 5.5   | 4.15  |
| j = 6  | 5.27  | 4.79  | 4.19  | 6.08  | 4.7   | 5.56  | 0     | 6.72  | 5.33  |
| j = 7  | 1.75  | 2.57  | 1.44  | 2.88  | 1.75  | 2.06  | 2.81  | 0     | 2.18  |

## 6 CONCLUSION

We proposed SPIDER, an algorithmic framework that can search personalized neural architecture for FL. SPIDER specializes a weight-sharing-based global regularization to perform progressive neural architecture search. Experimental results demonstrate that SPIDER outperforms other state-of-the-art personalization methods by searching and training a personalized architecture for each client.

## REFERENCES

- Gary Cheng, Karan N. Chadha, and John C. Duchi. Fine-tuning in federated learning: a simple but tough-to-beat baseline. 2021.
- Enmao Diao, Jie Ding, and Vahid Tarokh. Heterofl: Computation and communication efficient federated learning for heterogeneous clients. *arXiv preprint arXiv:2010.01264*, 2020.
- Canh T Dinh, Nguyen H Tran, and Tuan Dung Nguyen. Personalized federated learning with moreau envelopes. *arXiv preprint arXiv:2006.08848*, 2020.
- Lukasz Dudziak, Stefanos Laskaridis, and Javier Fernandez-Marques. Fedoras: Federated architecture search under system heterogeneity. *arXiv preprint arXiv:2206.11239*, 2022.
- Alireza Fallah, Aryan Mokhtari, and Asuman Ozdaglar. Personalized federated learning: A meta-learning approach. *arXiv preprint arXiv:2002.07948*, 2020a.
- Alireza Fallah, Aryan Mokhtari, and Asuman E. Ozdaglar. Personalized federated learning: A meta-learning approach. *ArXiv*, abs/2002.07948, 2020b.
- Avishek Ghosh, Jichan Chung, Dong Yin, and Kannan Ramchandran. An efficient framework for clustered federated learning. *ArXiv*, abs/2006.04088, 2020.
- Filip Hanzely and Peter Richtárik. Federated learning of a mixture of global and local models. *arXiv preprint arXiv:2002.05516*, 2020.
- Chaoyang He, Murali Annavaram, and Salman Avestimehr. Group knowledge transfer: Federated learning of large cnns at the edge. *arXiv: Learning*, 2020a.
- Chaoyang He, Murali Annavaram, and Salman Avestimehr. Fednas: Federated deep learning via neural architecture search. *arXiv e-prints*, pp. arXiv–2004, 2020b.
- Chaoyang He, Songze Li, Jinhyun So, Xiao Zeng, Mi Zhang, Hongyi Wang, Xiaoyang Wang, Praneeth Vepakomma, Abhishek Singh, Hang Qiu, et al. Fedml: A research library and benchmark for federated machine learning. *arXiv preprint arXiv:2007.13518*, 2020c.
- Chaoyang He, Haishan Ye, Li Shen, and Tong Zhang. Milenas: Efficient neural architecture search via mixed-level reformulation. In *Proceedings of the IEEE/CVF Conference on Computer Vision and Pattern Recognition*, pp. 11993–12002, 2020d.
- Minh Hoang and Carl Kingsford. Personalized neural architecture search for federated learning. 2021.
- Shoukang Hu, Sirui Xie, Hehui Zheng, Chunxiao Liu, Jianping Shi, Xunying Liu, and Dahua Lin. Dsnas: Direct neural architecture search without parameter retraining. In *Proceedings of the IEEE/CVF Conference on Computer Vision and Pattern Recognition*, pp. 12084–12092, 2020.
- Yesmina Jaafra, Jean Luc Laurent, Aline Deruyver, and Mohamed Saber Naceur. Reinforcement learning for neural architecture search: A review. *Image and Vision Computing*, 89:57–66, 2019.
- Yihan Jiang, Jakub Konečný, Keith Rush, and Sreeram Kannan. Improving federated learning personalization via model agnostic meta learning. *ArXiv*, abs/1909.12488, 2019.
- Sai Praneeth Karimireddy, Satyen Kale, Mehryar Mohri, Sashank J. Reddi, Sebastian U. Stich, and Ananda Theertha Suresh. Scaffold: Stochastic controlled averaging for federated learning. In *ICML*, 2020.
- Chaojian Li, Zhongzhi Yu, Yonggan Fu, Yongan Zhang, Yang Zhao, Haoran You, Qixuan Yu, Yue Wang, and Yingyan Lin. Hw-nas-bench: Hardware-aware neural architecture search benchmark. *arXiv preprint arXiv:2103.10584*, 2021a.
- Tian Li, Anit Kumar Sahu, Manzil Zaheer, Maziar Sanjabi, Ameet Talwalkar, and Virginia Smith. Federated optimization in heterogeneous networks. *arXiv preprint arXiv:1812.06127*, 2018.

- Tian Li, Shengyuan Hu, Ahmad Beirami, and Virginia Smith. Ditto: Fair and robust federated learning through personalization. In *International Conference on Machine Learning*, pp. 6357–6368. PMLR, 2021b.
- Paul Pu Liang, Terrance Liu, Liu Ziyin, Ruslan Salakhutdinov, and Louis-Philippe Morency. Think locally, act globally: Federated learning with local and global representations. *ArXiv*, abs/2001.01523, 2020.
- Tao Lin, Lingjing Kong, Sebastian U. Stich, and Martin Jaggi. Ensemble distillation for robust model fusion in federated learning. *ArXiv*, abs/2006.07242, 2020a.
- Tao Lin, Lingjing Kong, Sebastian U Stich, and Martin Jaggi. Ensemble distillation for robust model fusion in federated learning. *arXiv preprint arXiv:2006.07242*, 2020b.
- Hanxiao Liu, Karen Simonyan, and Yiming Yang. Darts: Differentiable architecture search. *arXiv preprint arXiv:1806.09055*, 2018.
- Yuqiao Liu, Yanan Sun, Bing Xue, Mengjie Zhang, Gary G Yen, and Kay Chen Tan. A survey on evolutionary neural architecture search. *IEEE Transactions on Neural Networks and Learning Systems*, 2021.
- Mi Luo, Fei Chen, Zhenguo Li, and Jiashi Feng. Architecture personalization in resource-constrained federated learning.
- Krishna Pillutla, Kshitiz Malik, Abdel-Rahman Mohamed, Mike Rabbat, Maziar Sanjabi, and Lin Xiao. Federated learning with partial model personalization. In *International Conference on Machine Learning*, pp. 17716–17758. PMLR, 2022.
- Sashank Reddi, Zachary Charles, Manzil Zaheer, Zachary Garrett, Keith Rush, Jakub Konečný, Sanjiv Kumar, and H Brendan McMahan. Adaptive federated optimization. *arXiv preprint arXiv:2003.00295*, 2020.
- Sashank J. Reddi, Zachary B. Charles, Manzil Zaheer, Zachary Garrett, Keith Rush, Jakub Konečný, Sanjiv Kumar, and H. Brendan McMahan. Adaptive federated optimization. *ArXiv*, abs/2003.00295, 2021.
- Santanu Santra, Jun-Wei Hsieh, and Chi-Fang Lin. Gradient descent effects on differential neural architecture search: A survey. *IEEE Access*, 9:89602–89618, 2021.
- Felix Sattler, Klaus-Robert Müller, and Wojciech Samek. Clustered federated learning: Model-agnostic distributed multitask optimization under privacy constraints. *IEEE transactions on neural networks and learning systems*, 2020.
- Felix Sattler, Klaus-Robert Müller, and Wojciech Samek. Clustered federated learning: Model-agnostic distributed multitask optimization under privacy constraints. *IEEE Transactions on Neural Networks and Learning Systems*, 32:3710–3722, 2021.
- Ishika Singh, Haoyi Zhou, Kunlin Yang, Meng Ding, Bill Lin, and Pengtao Xie. Differentially-private federated neural architecture search. *arXiv preprint arXiv:2006.10559*, 2020.
- Virginia Smith, Chao-Kai Chiang, Maziar Sanjabi, and Ameet Talwalkar. Federated multi-task learning. *arXiv preprint arXiv:1705.10467*, 2017a.
- Virginia Smith, Chao-Kai Chiang, Maziar Sanjabi, and Ameet S. Talwalkar. Federated multi-task learning. In *NIPS*, 2017b.
- Jianyu Wang, Qinghua Liu, Hao Liang, Gauri Joshi, and H Vincent Poor. Tackling the objective inconsistency problem in heterogeneous federated optimization. *arXiv preprint arXiv:2007.07481*, 2020.
- Kangkang Wang, Rajiv Mathews, Chloé Kiddon, Hubert Eichner, Francoise Beaufays, and Daniel Ramage. Federated evaluation of on-device personalization. *ArXiv*, abs/1910.10252, 2019.
- Ruochen Wang, Minhao Cheng, Xiangning Chen, Xiaocheng Tang, and Cho-Jui Hsieh. Rethinking architecture selection in differentiable nas. *arXiv preprint arXiv:2108.04392*, 2021.

- Bichen Wu, Xiaoliang Dai, Peizhao Zhang, Yanghan Wang, Fei Sun, Yiming Wu, Yuandong Tian, Peter Vajda, Yangqing Jia, and Kurt Keutzer. Fbnet: Hardware-aware efficient convnet design via differentiable neural architecture search. In *Proceedings of the IEEE/CVF Conference on Computer Vision and Pattern Recognition*, pp. 10734–10742, 2019.
- Mengwei Xu, Yuxin Zhao, Kaigui Bian, Gang Huang, Qiaozhu Mei, and Xuanzhe Liu. Federated neural architecture search. *arXiv preprint arXiv:2002.06352*, 2020.
- Lei Yang, Zheyu Yan, Meng Li, Hyoukjun Kwon, Liangzhen Lai, Tushar Krishna, Vikas Chandra, Weiwen Jiang, and Yiyu Shi. Co-exploration of neural architectures and heterogeneous asic accelerator designs targeting multiple tasks. In *2020 57th ACM/IEEE Design Automation Conference (DAC)*, pp. 1–6. IEEE, 2020.
- Tao Yu, Eugene Bagdasaryan, and Vitaly Shmatikov. Salvaging federated learning by local adaptation. *ArXiv*, abs/2002.04758, 2020a.
- Tao Yu, Eugene Bagdasaryan, and Vitaly Shmatikov. Salvaging federated learning by local adaptation. *arXiv preprint arXiv:2002.04758*, 2020b.
- Mikhail Yurochkin, Mayank Agarwal, Soumya Ghosh, Kristjan Greenewald, Nghia Hoang, and Yasaman Khazaeni. Bayesian nonparametric federated learning of neural networks. In *International Conference on Machine Learning*, pp. 7252–7261. PMLR, 2019.
- Hangyu Zhu and Yaochu Jin. Real-time federated evolutionary neural architecture search. *IEEE Transactions on Evolutionary Computation*, 2021.

## A APPENDIX

### A DATA HETEROGENEITY AND HYPERPARAMETERS

#### A.1 DATA HETEROGENEITY

Figure 3 and 4 represents data distribution across 8 clients for CIFAR10 and CIFAR100 datasets, respectively. Sub-figure 3a and 4a represent the label distribution across clients, where a darker color indicates more images of that class/label. It can be seen from these sub-figures that the data distribution is heterogeneous label-wise, e.g, Client with ID 0 has class 0 and 9 in excess, whereas, Client with ID 7 has more samples of class 3 and 7 for the CIFAR10 dataset. We observe a similar trend of heterogeneity for CIFAR100 as well, where we have 100 class labels distributed across 8 clients via LDA distribution with  $\alpha$  parameter = 0.2. Furthermore, the sub-figures 3b and 4c represent the total number of data samples preset at each client. These figures illustrate that the number of samples is also varying across silos. However, the variation in the total number of samples by silo is more prominent for the CIFAR10 dataset.

#### A.2 HYPER-PARAMETERS SEARCH

For empirical results of CIFAR10, CIFAR100, and CINIC10, we use a batch size of 32 for all our experiments. We use LDA distribution with a 0.2 parameter value. For SPIDER, we use the first 30 rounds as warmup rounds, for SPIDER-Searcher, we use a recovery period of 20. Furthermore, we use a learning rate in the search range of  $\{0.01, 0.03\}$  for SPIDER. For SPIDER, we used  $\lambda$  search from the set of  $\{0.01, 0.1\}$ . For the other personalized schemes such as Ditto, perFedAvg, and local adaptation with Resnet18, we searched learning rate over the set  $\{0.1, 0.3, 0.01, 0.03, 0.001, 0.003\}$ . The reason for having a larger set of learning rates for these methods is that we found 0.001 and 0.003 work better for these methods. For Ditto, we used  $\lambda$  from the set  $\{0.01, 0.1, 1, 2\}$ . We used 1000 rounds of communication for the reported results and observed that they were sufficient to achieve convergence as shown in Figure 2.

Another interesting feature we observed from empirical experiments is that the hyper-parameters for SPIDER were pretty stable for all three datasets, lr 0.01 and lambda 0.01 were the optimal values. However, the optimal hyper-parameters changed for the other three methods from dataset to dataset. We provide the best hyper-parameters selected for the reported results in Table 3.

#### A.3 ARCHITECTURE SEARCH SPACE

As mentioned in Section 4.2, we have used DARTS (s2) search space Wang et al. (2021) in our proposed work. During the search, we are using a total of 8 cells. Each cell consists of 14 edges; each edge connects two intermediate representations (node) by a mixture of two operations frequently used in various modern CNNs (e.g., sep convolution 3x3 and skip connection). In this search space, there are two types of cells: normal and reduction cells. Hence, our supernet  $\mathcal{A}$  consists of search space of normal cells and reduction cells, each with a matrix of size 14x2, 14 signifies the total number of edge connections and 2 denotes the total number of operations at each edge connection. Hence, the mask  $M$  for the supernet has dimensions 28x2. Initially, all entries are 1 in the search space masks for both supernet  $M$  and local child model  $M_k$ . As the search progresses via progressive NAS 2, some operations and edges are removed based on the perturbation criterion explained in Algorithm 2. We visualize the normal cells searched for CIFAR10 in Figure 7. It can be seen from Figure 7 that the searched cells are edge-wise and operation-wise heterogeneous from client to client. It is important to note that the same cells follow the same construction; therefore, if one operation is selected for one normal cell at a particular edge, the same operation will be selected for the same edge at all normal cells.

## B PERSONALIZED NAS VERSUS GLOBAL NAS

In this section, we compare our proposed scheme of architecture personalization with three different settings of NAS. First, we compare our method to a basic setting of NAS, which is a centralized

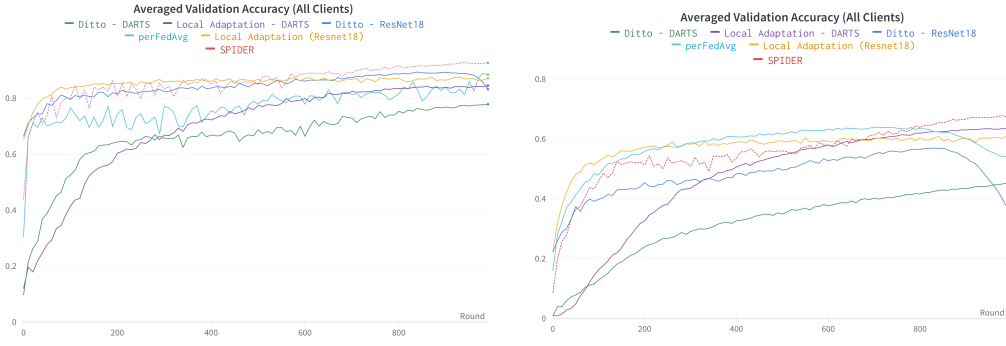

(a) Average Validation Accuracy comparison on CIFAR10 Dataset

(b) Average Validation Accuracy comparison on CIFAR100 Dataset

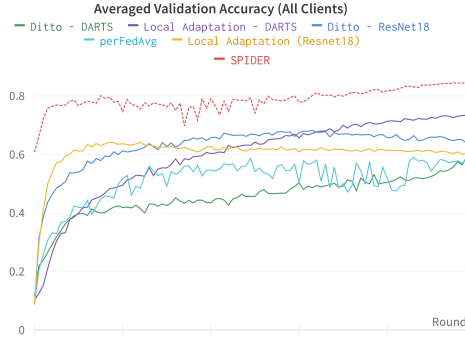

(c) Average Validation Accuracy comparison on CINIC10 Dataset

Figure 2: Comparison of our proposed method, SPIDER, with other state-of-the-art personalization methods (perFedAvg, Ditto, and local adaptation) with CIFAR10 (a), CIFAR100 (b) and CINIC10 datasets. For both of these datasets, our method outperforms the representative sota personalization methods.

Table 3: Manually Searched Hyper-parameters (learning rate (lr) and  $\lambda$  for SPIDER and the other personalization schemes for three datasets; CIFAR10, CIFAR100 and CINIC10

| Method                      | CIFAR10                     | CIFAR100                    | CINIC10                     |
|-----------------------------|-----------------------------|-----------------------------|-----------------------------|
| SPIDER                      | lr = 0.01, $\lambda = 0.01$ | lr = 0.01, $\lambda = 0.01$ | lr = 0.01, $\lambda = 0.01$ |
| Local Adaptation - ResNet18 | lr = 0.001                  | lr = 0.001                  | lr = 0.3                    |
| Ditto - ResNet18            | lr = 0.001, $\lambda = 1$   | lr = 0.001, $\lambda = 0.1$ | lr = 0.1, $\lambda = 2$     |
| perFedAvg - ResNet18        | lr = 0.003                  | lr = 0.001                  | lr = 0.01                   |
| Local Adaptation - DARTS    | lr = 0.01                   | lr = 0.01                   | lr = 0.01                   |
| Ditto - DARTS               | lr = 0.01, $\lambda = 1$    | lr = 0.01, $\lambda = 0.1$  | lr = 0.01, $\lambda = 0.1$  |

NAS. Next, we compare it to Federated NAS, which searches a global architecture in a federated manner and then trains it via FedAvg. In the next experiment, we add an l2 regularization-based PFL scheme to train the global architecture searched via Federated NAS. This investigation can help us appreciate the benefits of architecture personalization in both centralized and federated learning settings.

### B.1 CENTRALIZED NEURAL ARCHITECTURE SEARCH

In this experiment setting, each silo performs a local neural architecture search. Each silo uses only one model, Supernet, and deploys the perturbation-based NAS Searcher locally **without any**



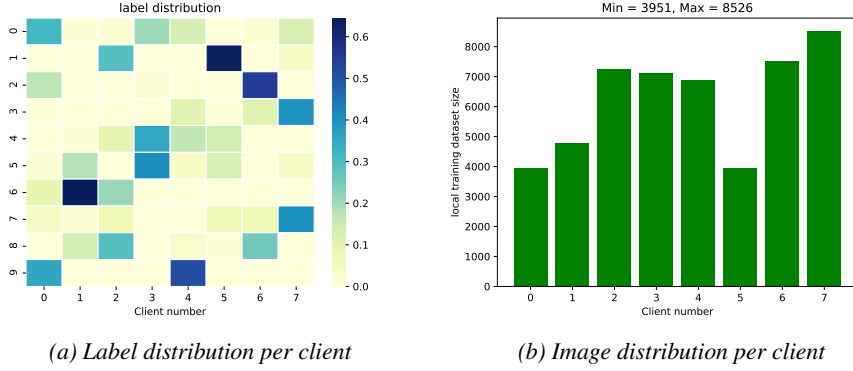

Figure 3: CIFAR10: LDA distribution

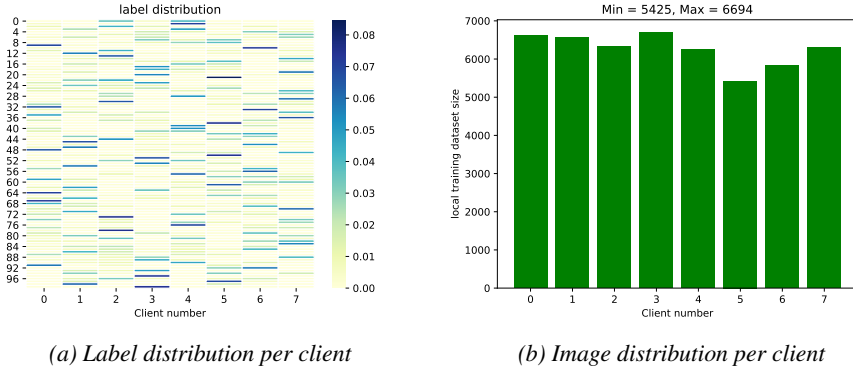

Figure 4: CIFAR100: LDA distribution

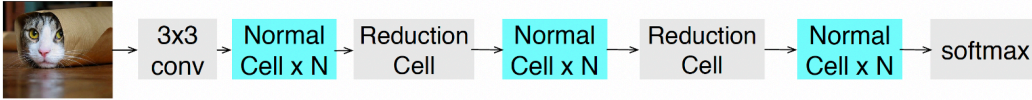Figure 5: Supernet A search space. Note that since we have 8 cell based search space,  $N = 2$  for our construction.

**collaboration from the other silos.** The Local Supernet has the same hyper-parameters of warmup (30 local epochs) and recovery period of 20 local epochs after every pruning step, followed by local training with a total of 1000 epochs. This search process can be analyzed from Figure 6b, where the local Supernet’s average FLOPs decrease as the search progresses. Figure 6a represents the average validation accuracy across each silo. We obtain 91% average validation accuracy on the CIFAR10 dataset without any collaboration, which outperforms various PFL baselines, and performs as good as FedorAS Dudziak et al. (2022). This shows the significance of tailoring architectures to the silo’s data distributions even for the centralized training case.

## B.2 FEDERATED NEURAL ARCHITECTURE SEARCH

Next, we analyze NAS performance in a federated setting. We analyze the federated neural architecture search setting, where only one Supernet is maintained at each silo. Each silo trains the Supernet following the FedAvg algorithm for 30 rounds of warmup. Next, the neural architecture search is performed following perturbation-based NAS at the server using the server’s test/validation data. After NAS, the architecture is obtained and trained in a federated manner by the FedAvg algorithm. This can be considered a slight variation of FedNAS He et al. (2020b) where we replace MiLeNAS He et al. (2020d) with a state-of-the-art NAS method, Perturbation-based NAS Wang et al. (2021). We obtain a total of 86% average validation accuracy, highlighting that a global model, even searched via NAS, may not be able to achieve personalization across all silos due to data heterogeneity.

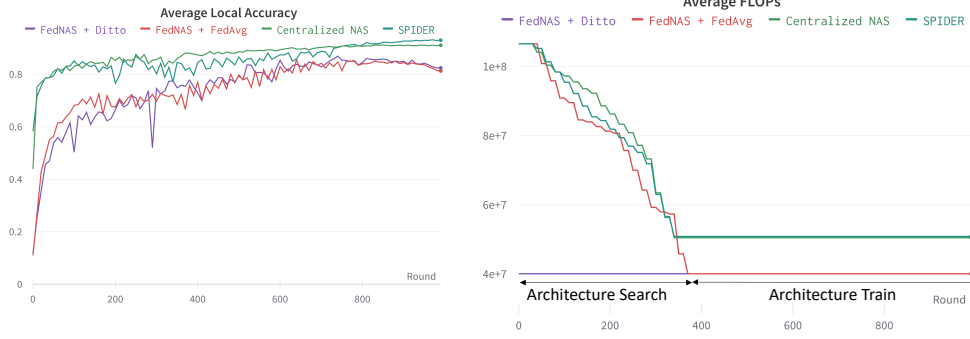

(a) Average Validation Accuracy comparison on CIFAR10 Dataset

(b) Average Flop counts of the Local Architectures

Figure 6: Average Validation Accuracy and Average Flops comparison of SPIDER with the centralized NAS, Federated NAS (FedNAS + FedAvg), and Federated NAS (FedNAS) combined with Ditto (FedNAS + Ditto).

### B.3 FEDERATED NEURAL ARCHITECTURE SEARCH AND PERSONALIZED FEDERATED LEARNING

Next, we analyze the significance of PFL in the context of federated NAS. We combine 12 regularization-based PFL method, Ditto Li et al. (2021b) for training the architecture searched via federated NAS in B.2. We find that this architecture only yields 87% average validation accuracy which is 6% lower than the average validation accuracy we obtain via SPIDER. This shows that architecture-based personalization as achieved via SPIDER can be stronger than the only weight parameters-based personalization.

### B.4 ARCHITECTURE PERSONALIZATION GAIN

In this subsection, we analyze the personalization gains of the architectures searched via SPIDER. In this regard, we visualize the normal cells of all the silos on the DARTS s2 search space for CIFAR10 datasets in Figure 7. We observed heterogeneity in architecture each client searches and trains using the proposed method SPIDER. It can be seen from Figure 7 that the searched cells are edge-wise and operation-wise heterogeneous from client to client. In order to further investigate whether the architecture searched by one client is best suited for its own data distribution, we perform the following experiment.

As also stated in subsection 5.2.2, for any given client  $i$ , we apply its final architecture with its learned weights to another client  $j$ 's data and finetune  $i$ 's architecture on  $j$ 's data. We denote the accuracy we obtain on data  $j$  via architecture  $i$  as  $AP_{ji}$ . We calculate the architecture  $i$  personalization gain or drop (if negative) as follows,

$$g_i = \frac{\sum_{j=0, j \neq i}^{c-1} (AP_{ii} - AP_{ji})}{c-1}, \quad (8)$$

where  $c$  is the total number of clients. In Table 4a, and 5a, we report  $AP_{ji}$  for the CIFAR10 and CIFAR100 datasets respectively across all silos. In addition, we report  $AP_{jj} - AP_{ji}$  values in Table 4b and 5b for CIFAR10 and CIFAR100 datasets, respectively. We also list the quantity  $g_j$  that lists the architecture  $j$ 's personalization gain against other clients' architectures. In addition to the personalization gain, we also report per-client accuracy for all the personalization schemes in Figure 8, where it can easily be observed that SPIDER outperforms the other state-of-the-art personalization methods on per silo based performance.

## C COMPUTATIONAL COST ANALYSIS OF TRAINING

In this section, we analyze the compute cost of the proposed method and the other representative personalized federated learning (PFL) methods. It is important to note that we obtain the peak memory and training time values for all methods on the NVIDIA RTX 2080Ti GPU card, i.e, each

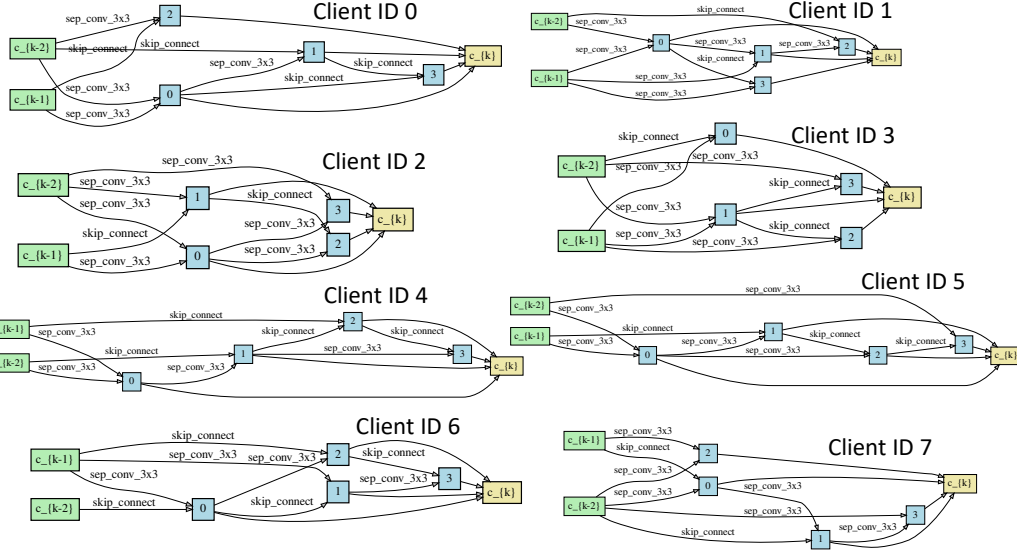

Figure 7: Searched Architectures (Normal Cells): Each normal cell  $k$  takes the outputs of previous cells, cell  $k - 2$  and cell  $k - 1$ , as its input. Each cell contains seven nodes: two input nodes, one output node, and four intermediate nodes inside the cell. The output node concatenates all intermediate nodes’ output depth-wise. It can be observed that the searched cells are edge-wise and operation-wise heterogeneous from client to client.

Table 4: CIFAR10: Personalization Gain Analysis

(a) Accuracy values of Architecture  $i$  on  $j$ ’s data (where  $i$  and  $j$  represent client IDs.

| (j, i) | i = 0 | i = 1 | i = 2 | i = 3 | i = 4 | i = 5 | i = 6 | i = 7 |
|--------|-------|-------|-------|-------|-------|-------|-------|-------|
| j = 0  | 88.15 | 85.02 | 88.54 | 85.58 | 84.46 | 86.71 | 88.54 | 85.67 |
| j = 1  | 92.99 | 95.25 | 93.75 | 92.78 | 92.24 | 92.6  | 92.45 | 91.9  |
| j = 2  | 92.64 | 92.71 | 95.07 | 95.00 | 92.5  | 94.23 | 93.26 | 93.6  |
| j = 3  | 90.83 | 90.83 | 91.83 | 92.12 | 91.12 | 90.69 | 89.98 | 90.8  |
| j = 4  | 89.17 | 88.51 | 90.47 | 89.24 | 91.13 | 90.18 | 88.2  | 89.17 |
| j = 5  | 89.97 | 89.97 | 90.62 | 89.45 | 89.32 | 92.32 | 88.93 | 90.01 |
| j = 6  | 90.96 | 89.94 | 91.92 | 89.94 | 89.74 | 91.84 | 93.40 | 91.51 |
| j = 7  | 91.74 | 91.27 | 91.86 | 91.62 | 89.74 | 91.68 | 91.39 | 92.81 |

(b) Accuracy Gain/Drop Matrix ( $AP_{jj} - AP_{ij}$ ) and the resultant  $g_j$  vector

| (j, i) | i = 0 | i = 1 | i = 2 | i = 3 | i = 4 | i = 5 | i = 6 | i = 7 | $g_j$ |
|--------|-------|-------|-------|-------|-------|-------|-------|-------|-------|
| j = 0  | 0.    | 3.13  | -0.39 | 2.57  | 3.69  | 1.44  | -0.39 | 2.48  | 1.79  |
| j = 1  | 2.26  | 0.    | 1.5   | 2.47  | 3.01  | 2.65  | 2.8   | 3.35  | 2.58  |
| j = 2  | 2.43  | 2.36  | 0.    | 0.07  | 2.57  | 0.84  | 1.81  | 1.47  | 1.65  |
| j = 3  | 1.29  | 1.29  | 0.29  | 0.    | 1.    | 1.43  | 2.14  | 1.32  | 1.25  |
| j = 4  | 1.96  | 2.62  | 0.66  | 1.89  | 0.    | 0.95  | 2.93  | 1.96  | 1.85  |
| j = 5  | 2.35  | 2.35  | 1.7   | 2.87  | 3.    | 0.    | 3.39  | 2.31  | 2.57  |
| j = 6  | 2.44  | 3.46  | 1.48  | 3.46  | 3.66  | 1.56  | 0.    | 1.89  | 2.56  |
| j = 7  | 1.07  | 1.54  | 0.95  | 1.19  | 3.07  | 1.13  | 1.42  | 0.    | 1.48  |

Table 5: CIFAR100: Personalization Gain Analysis

(a) Accuracy values of Architecture  $i$  on  $j$ ’s data (where  $i$  and  $j$  represent client IDs.

| (j, i) | i = 0 | i = 1 | i = 2 | i = 3 | i = 4 | i = 5 | i = 6 | i = 7 |
|--------|-------|-------|-------|-------|-------|-------|-------|-------|
| j = 0  | 65.32 | 62.65 | 62.42 | 62.88 | 62.95 | 62.04 | 62.80 | 62.42 |
| j = 1  | 68.67 | 72.17 | 67.68 | 68.75 | 68.52 | 69.81 | 69.66 | 67.45 |
| j = 2  | 60.41 | 60.08 | 63.38 | 60.17 | 59.37 | 59.61 | 62.09 | 61.05 |
| j = 3  | 68.81 | 69.05 | 67.37 | 72.32 | 68.06 | 67.45 | 68.90 | 69.43 |
| j = 4  | 68.83 | 69.87 | 67.30 | 69.8  | 71.79 | 69.07 | 70.03 | 69.31 |
| j = 5  | 65.81 | 65.65 | 64.96 | 66.19 | 65.05 | 67.67 | 65.81 | 62.21 |
| j = 6  | 66.49 | 64.84 | 62.76 | 63.88 | 64.40 | 64.93 | 68.48 | 63.97 |
| j = 7  | 67.22 | 66.74 | 67.47 | 67.78 | 67.38 | 67.22 | 67.30 | 69.87 |

(b) Accuracy Gain/Drop Matrix ( $AP_{jj} - AP_{ij}$ ) and the resultant  $g_j$  vector

| (j, i) | i = 0 | i = 1 | i = 2 | i = 3 | i = 4 | i = 5 | i = 6 | i = 7 | $AP_j$ |
|--------|-------|-------|-------|-------|-------|-------|-------|-------|--------|
| j = 0  | 0.    | 2.67  | 2.9   | 2.44  | 2.37  | 3.28  | 2.52  | 2.9   | 2.73   |
| j = 1  | 3.5   | 0.    | 4.49  | 3.42  | 3.65  | 2.36  | 2.51  | 4.72  | 3.52   |
| j = 2  | 2.97  | 3.3   | 0.    | 3.21  | 4.01  | 3.77  | 1.29  | 2.33  | 2.98   |
| j = 3  | 3.51  | 3.27  | 4.95  | 0.    | 4.26  | 4.87  | 3.42  | 2.89  | 3.88   |
| j = 4  | 2.96  | 1.92  | 4.49  | 1.99  | 0.    | 2.72  | 1.76  | 2.48  | 2.62   |
| j = 5  | 1.86  | 2.02  | 2.71  | 1.48  | 2.62  | 0.    | 1.86  | 5.46  | 2.57   |
| j = 6  | 1.99  | 3.64  | 5.72  | 4.6   | 4.08  | 3.55  | 0.    | 4.51  | 4.01   |
| j = 7  | 2.65  | 3.13  | 2.4   | 2.09  | 2.49  | 2.657 | 2.57  | 0.    | 2.57   |

silo is a physical node that has an NVIDIA RTX 2080Ti GPU card inside. The peak compute cost per silo of the representative PFL methods is 1.99GB, 2.03 GB, 2.32GB, 2.03 GB for FedorASDudziak et al. (2022), perFedAvg, Ditto and perFedAvg, respectively as shown in Table 6. SPIDER requires peak memory of around 3.42 GB per silo at the start. However, as training progresses the local model gets pruned and becomes smaller and the compute cost reduces to 2.6 GB. Since we are working in a cross-silo regime, peak memory or communication cost may not be a big concern. SPIDER takes 21 hours to complete one run, which includes both personalized architecture search and personalized architecture training. On the other hand, Local adaptation, Ditto, and perFedAvg require 2.5, 4, and 6 hours for one run of training. However, it does not include the practical scenario of the cost of hyper-parameter tuning and architecture selection tuning. For example, for Ditto, we have 18 possible iterations for our hyper-parameter set for resnet18 and the total cost becomes 72

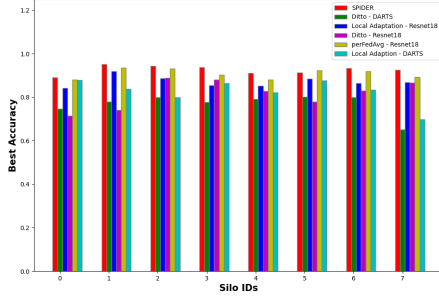

(a) Best Accuracy per client on CIFAR10 Dataset

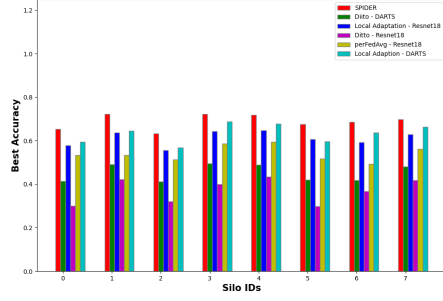

(b) Best Accuracy per client on CIFAR100 Dataset

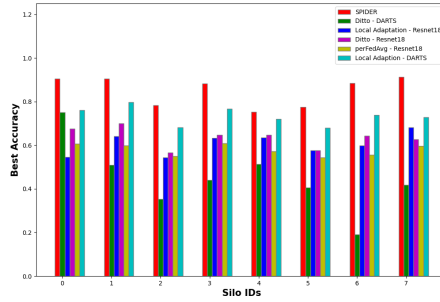

(c) Best Accuracy per client on CINIC10 Dataset

Figure 8: Per Client Performance of different personalization schemes on CIFAR10, CIFAR100 and CINIC10 datasets. Note that SPIDER outperforms the other personalization methods for most of the methods over three datasets.

hours. If we were to include the cost of hyper-parameter tuning on DARTs architecture as well, it becomes 144 hours. That’s where the run time costs become comparable. Even by paying this price, we are not able to achieve optimal performance with these representative PFL schemes. Hence, in data heterogeneous settings, it is challenging for the server to select one architecture that would work for all the silos as the manual architecture search can be time-consuming.

Table 6: Accuracy versus Computational Cost Tradeoff on CIFAR10 dataset for SPIDER versus other representative personalized federated learning techniques such as Local Adaptation, Ditto, perFedAvg, FedorAS.

| Method                        | Training Time | Accuracy | Peak Memory Cost |
|-------------------------------|---------------|----------|------------------|
| SPIDER                        | 21 h          | 93%      | 3.42GB           |
| Local Adaptation - ResNet18   | 2.5 h         | 85%      | 2.03GB           |
| Ditto - ResNet18              | 4 h           | 90%      | 2.32GB           |
| perFedAvg - ResNet18          | 6h            | 91%      | 2.03GB           |
| FedoARS Dudziak et al. (2022) | —             | 91%      | 1.99GB           |

It is also important to study it from a tradeoff between accuracy and compute power perspective. As an example, we compare SPIDER with FedorAS Dudziak et al. (2022), a NAS-based scheme that personalizes architectures to compute-based clusters such that silos belonging to one cluster are assigned the same architecture. We find that with SPIDER, we can achieve high accuracy (93%) across silos by paying the price of high compute (3.4 GB peak memory cost), whereas FedorAS, which personalizes architecture on a compute-power-based cluster level basis, consumes (1.9GB) peak memory cost only but pays the price of lower accuracy (91%). In our ablation study, we find that if each silo performs centralized NAS and local training, they can achieve 91% accuracy

as well. However, SPIDER assists each silo to search for a personalized architecture tailored to its own data distribution while also learning from other silos. This architecture personalization yields a 2% performance gain on the CIFAR10 dataset that can be a significant gain for organizations that require high accuracy without the constraint of compute cost. Hence, the main motivation of our work has been to empower clients to search for architectures that are better suited for their local data distribution. This yields better performance in terms of accuracy as compared to the state-of-the-art personalization schemes. In addition, this architecture personalization technique can reduce the cost of manual search over architectures that can become expensive because data is heterogeneous across silos and completely unknown at the server in a federated learning setting.
